# Supplementary material
Source: publisher figshare collection journal article supplement (https://tandf.figshare.com/articles/dataset/_/1568332)
Supplement: Supplementary file 4 [file 3]

The folders contain all the code required to reproduce the results reported in the article. The naming of the folders is hopefully self explanatory.

The file Functions.R contains the functions that were written to implement ADAP. The code contained in the various folders calls Functions.R
