# Supplementary material
Source: publisher figshare collection journal article supplement (https://tandf.figshare.com/articles/dataset/_/1568332)

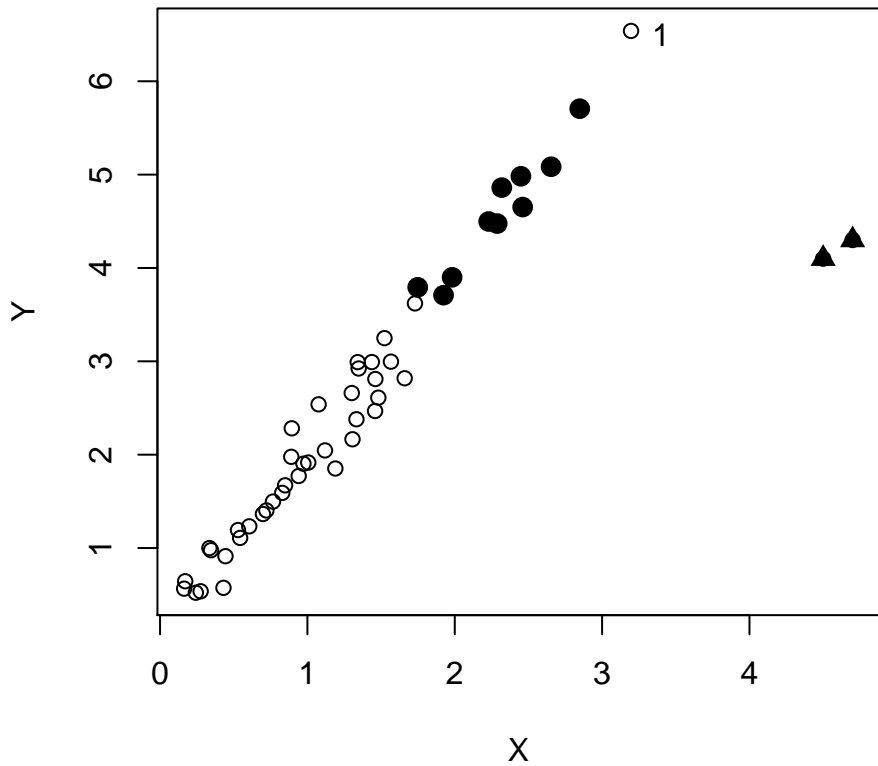

Supplement: Supplementary file 1 [file 3]

**n=100**

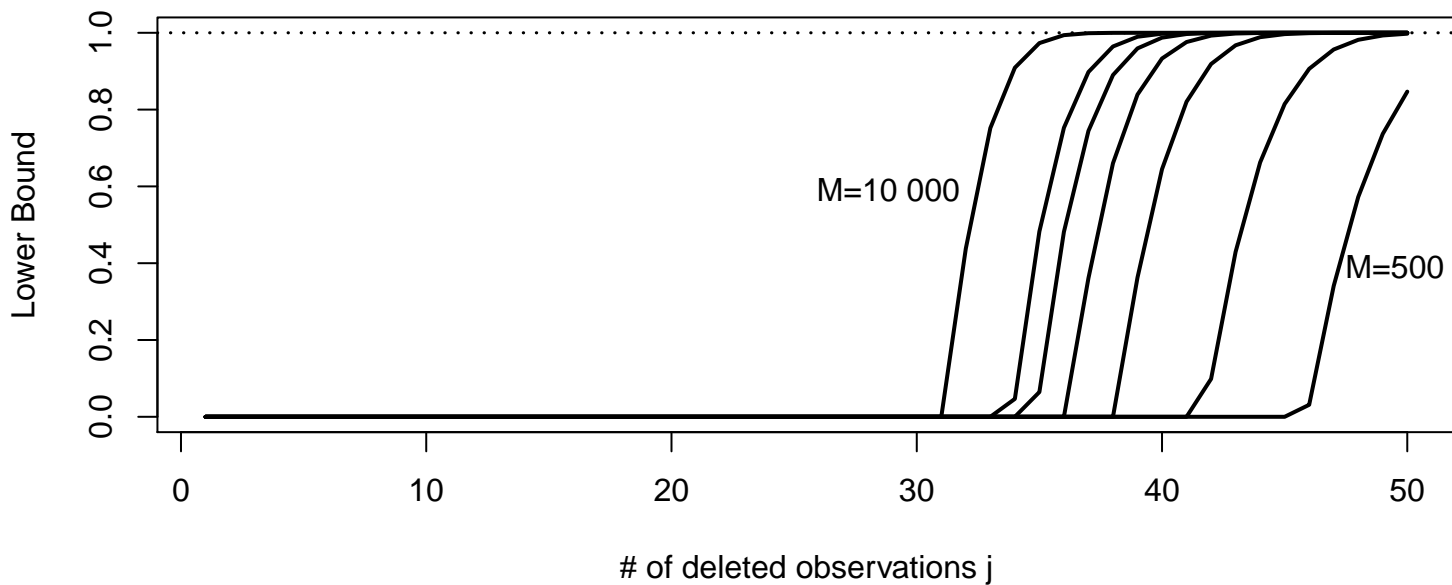

**n=1000**

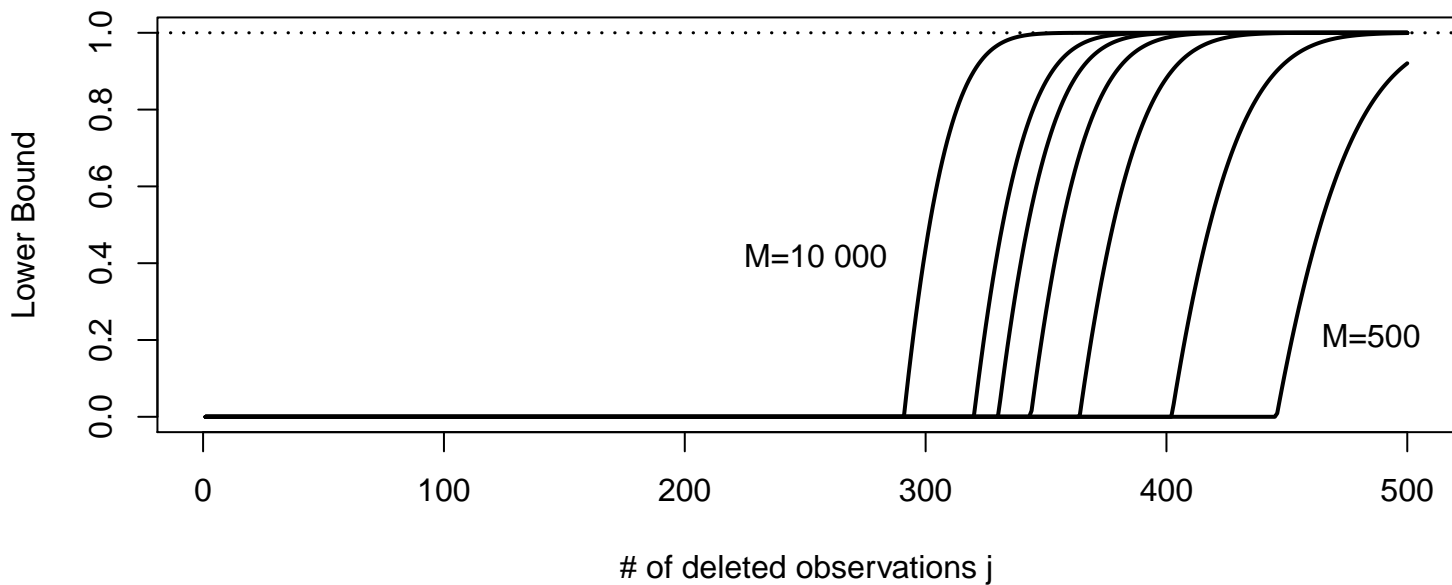

Supplement: Supplementary file 2 [file 3]

**SIR Coordinate Plot – Hawkins–Bradu–Kass Data**

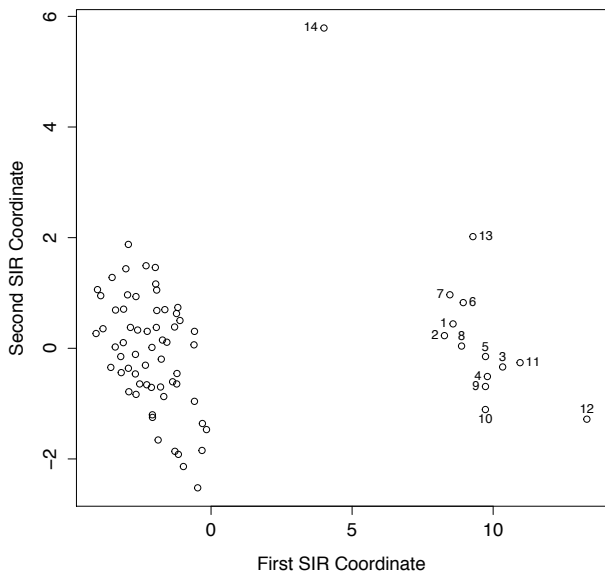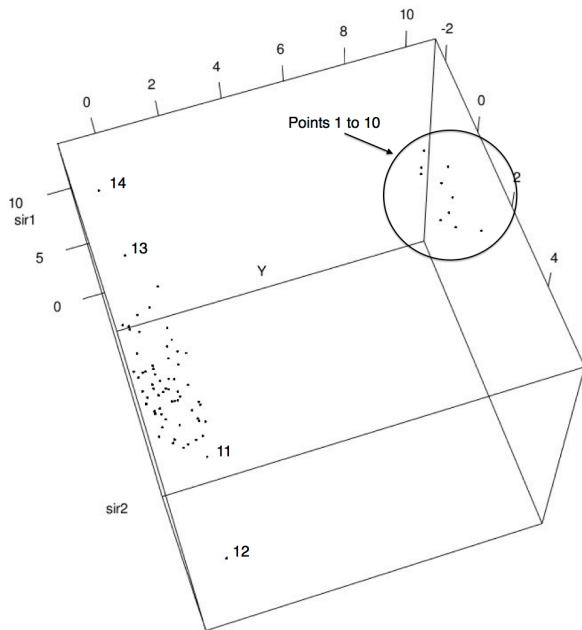

**SAVE Coordinate Plot – Hawkins–Bradu–Kass Data**

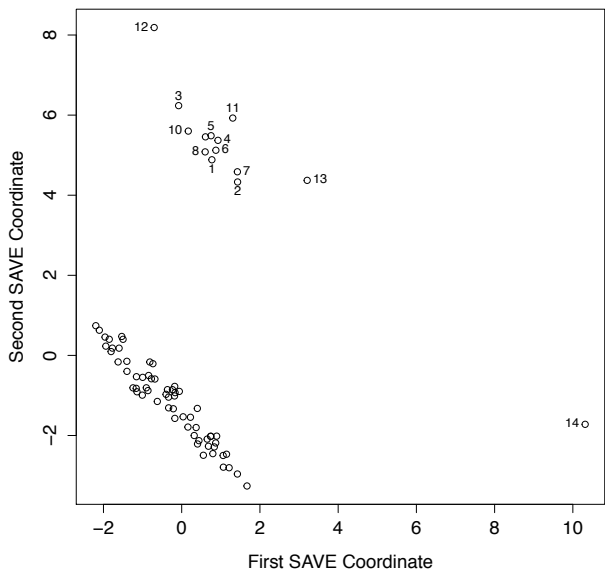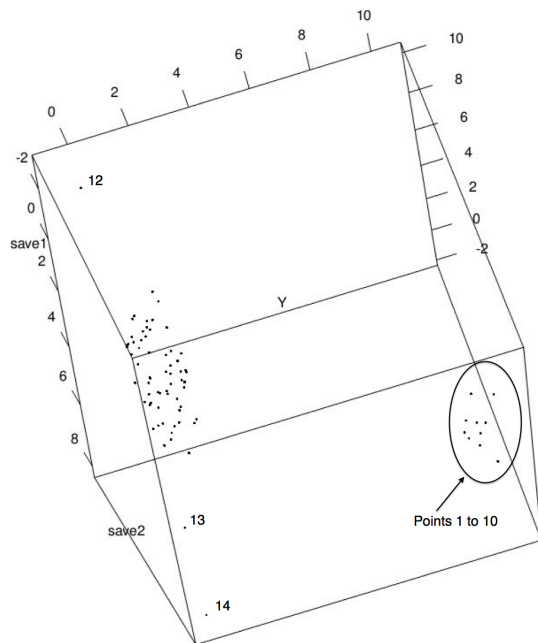

Supplement: Supplementary file 3 [file 3]
